# Supplementary material
Source: PubMed Central journal article supplement (PMC2288533)
Supplement: rspb20070576s08.pdf [file rspb20070576s08.pdf]

**a** Multiple Comparisons

Dependent Variable: Thres  
Bonferroni

| (I) Disp | (J) Disp | Mean Difference (I-J) | Std. Error | Sig.  | 95% Confidence Interval |             |
|----------|----------|-----------------------|------------|-------|-------------------------|-------------|
|          |          |                       |            |       | Lower Bound             | Upper Bound |
| .07      | .14      | 24.68500*             | 5.27814    | .003  | 8.0447                  | 41.3253     |
|          | .21      | 28.37500*             | 5.27814    | .001  | 11.7347                 | 45.0153     |
|          | .28      | 29.38000*             | 5.27814    | .001  | 12.7197                 | 46.0003     |
| .14      | .07      | -24.68500*            | 5.27814    | .003  | -41.3253                | -8.0447     |
|          | .21      | 3.69000               | 5.27814    | 1.000 | -12.9503                | 20.3303     |
|          | .28      | 4.67500               | 5.27814    | 1.000 | -11.9653                | 21.3153     |
| .21      | .07      | -28.37500*            | 5.27814    | .001  | -45.0153                | -11.7347    |
|          | .14      | -3.69000              | 5.27814    | 1.000 | -20.3303                | 12.9503     |
|          | .28      | .98500                | 5.27814    | 1.000 | -15.6553                | 17.6253     |
| .28      | .07      | -29.38000*            | 5.27814    | .001  | -46.0003                | -12.7197    |
|          | .14      | -4.67500              | 5.27814    | 1.000 | -21.3153                | 11.9653     |
|          | .21      | -.98500               | 5.27814    | 1.000 | -17.6253                | 15.6553     |

\*. The mean difference is significant at the .05 level.

**b** Multiple Comparisons

Dependent Variable: RT\_Diff  
Bonferroni

| (I) Disp | (J) Disp | Mean Difference (I-J) | Std. Error | Sig.  | 95% Confidence Interval |             |
|----------|----------|-----------------------|------------|-------|-------------------------|-------------|
|          |          |                       |            |       | Lower Bound             | Upper Bound |
| .07      | .14      | .10400                | .05911     | .624  | -.0823                  | .2903       |
|          | .21      | .16300                | .05911     | .104  | -.0233                  | .3493       |
|          | .28      | .18700*               | .05911     | .049  | .0007                   | .3733       |
| .14      | .07      | -.10400               | .05911     | .624  | -.2903                  | .0823       |
|          | .21      | .05900                | .05911     | 1.000 | -.1273                  | .2453       |
|          | .28      | .08300                | .05911     | 1.000 | -.1033                  | .2693       |
| .21      | .07      | -.16300               | .05911     | .104  | -.3493                  | .0233       |
|          | .14      | -.05900               | .05911     | 1.000 | -.2453                  | .1273       |
|          | .28      | .02400                | .05911     | 1.000 | -.1623                  | .2103       |
| .28      | .07      | -.18700*              | .05911     | .049  | -.3733                  | -.0007      |
|          | .14      | -.08300               | .05911     | 1.000 | -.2693                  | .1033       |
|          | .21      | -.02400               | .05911     | 1.000 | -.2103                  | .1623       |

\*. The mean difference is significant at the .05 level.

**c** Multiple Comparisons

Dependent Variable: PS\_Diff  
Bonferroni

| (I) Disp | (J) Disp | Mean Difference (I-J) | Std. Error | Sig.  | 95% Confidence Interval |             |
|----------|----------|-----------------------|------------|-------|-------------------------|-------------|
|          |          |                       |            |       | Lower Bound             | Upper Bound |
| .07      | .14      | 8.50000               | 11.36469   | 1.000 | -27.3293                | 44.3293     |
|          | .21      | 57.00000*             | 11.36469   | .002  | 21.1707                 | 92.8293     |
|          | .28      | 57.75000*             | 11.36469   | .002  | 21.9207                 | 93.5793     |
| .14      | .07      | -8.50000              | 11.36469   | 1.000 | -44.3293                | 27.3293     |
|          | .21      | 48.50000*             | 11.36469   | .007  | 12.6707                 | 84.3293     |
|          | .28      | 49.25000*             | 11.36469   | .006  | 13.4207                 | 85.0793     |
| .21      | .07      | -57.00000*            | 11.36469   | .002  | -92.8293                | -21.1707    |
|          | .14      | -48.50000*            | 11.36469   | .007  | -84.3293                | -12.6707    |
|          | .28      | -.75000               | 11.36469   | 1.000 | -35.0793                | 36.5793     |
| .28      | .07      | -57.75000*            | 11.36469   | .002  | -93.5793                | -21.9207    |
|          | .14      | -49.25000*            | 11.36469   | .006  | -85.0793                | -13.4207    |
|          | .21      | -.75000               | 11.36469   | 1.000 | -36.5793                | 35.0793     |

\*. The mean difference is significant at the .05 level.

## **SUPPLEMENTARY FILE LEGEND**

SUPPLEMENTARY FILE 1: (a-c) Tables showing the results of post-hoc tests contrasting measures of the dependent variables across different magnitudes of disparity change. Tables are shown for contrasts of (a) Temporal Threshold Differences (TTDs) from Experiment 1, (b) Reaction Time Differences (RTs) from Experiment 2, and (c) for Perceived Synchrony Differences (PSDs) from Experiment 3.
